# Supplementary material for: Antitumor efficacy of doxorubicin-loaded electrospun nano-hydroxyapatite–poly(lactic-co-glycolic acid) composite nanofibers
Source: Royal Society of Chemistry journal article supplement (doi:10.1039/c2py20779f), 2012-10-12
Supplement: c2py20779f.pdf [file c2py20779f.pdf]

## Electronic Supplementary Information

### Antitumor efficacy of doxorubicin-loaded electrospun nano-hydroxyapatite/poly(lactic-co-glycolic acid) composite nanofibers

Fuyin Zheng,<sup>a</sup> Shige Wang,<sup>b</sup> Mingwu Shen,<sup>\*a</sup> Meifang Zhu,<sup>b</sup> Xiangyang Shi<sup>\*abc</sup>

<sup>a</sup> College of Chemistry, Chemical Engineering and Biotechnology, Donghua University, Shanghai 201620, People's Republic of China. E-mail: [xshi@dhu.edu.cn](mailto:xshi@dhu.edu.cn) (X. Shi) and [mingwu.shen@yahoo.com](mailto:mingwu.shen@yahoo.com) (M. Shen)

<sup>b</sup> State Key Laboratory for Modification of Chemical Fibers and Polymer Materials, Donghua University, Shanghai 201620, People's Republic of China.

<sup>c</sup> CQM-Centro de Química da Madeira, Universidade da Madeira, Campus da Penteada, 9000-390 Funchal, Portugal

**Table S1.** Diffraction angle and plane spacing data of n-HA and DOX/n-HA from XRD analysis.

| Diffraction plane ( <i>hkl</i> ) | 2 $\theta$ peak position (°) |          | Plane spacing (d, Å) |          |
|----------------------------------|------------------------------|----------|----------------------|----------|
|                                  | n-HA                         | DOX/n-HA | n-HA                 | DOX/n-HA |
| (002)                            | 25.86                        | 25.88    | 3.442                | 3.440    |
| (210)                            | 29.02                        | 29.02    | 3.074                | 3.074    |
| (211)                            | 31.84                        | 31.84    | 2.808                | 2.808    |
| (300)                            | 32.98                        | 32.98    | 2.714                | 2.714    |
| (202)                            | 34.10                        | 34.06    | 2.528                | 2.630    |
| (130)                            | 39.84                        | 39.86    | 2.261                | 2.260    |
| (222)                            | 46.74                        | 46.74    | 1.942                | 1.942    |
| (213)                            | 49.48                        | 49.48    | 1.841                | 1.841    |
| (004)                            | 53.18                        | 53.14    | 1.721                | 1.722    |

**Table S2.** Mechanical properties of PLGA, n-HA /PLGA, and DOX/n-HA/PLGA nanofibers (data are representative of independent experiments and all data are given as mean  $\pm$  SD, n = 3).

| Sample        | Breaking strength (MPa) | Failure strain (%) | Young's modulus (MPa) |
|---------------|-------------------------|--------------------|-----------------------|
| PLGA          | 5.27 $\pm$ 0.36         | 173.67 $\pm$ 22.97 | 81.34 $\pm$ 17.34     |
| n-HA/PLGA     | 7.39 $\pm$ 0.34         | 118.92 $\pm$ 24.07 | 190.89 $\pm$ 13.46    |
| DOX/n-HA/PLGA | 6.99 $\pm$ 0.37         | 136.25 $\pm$ 14.54 | 254.45 $\pm$ 8.44     |

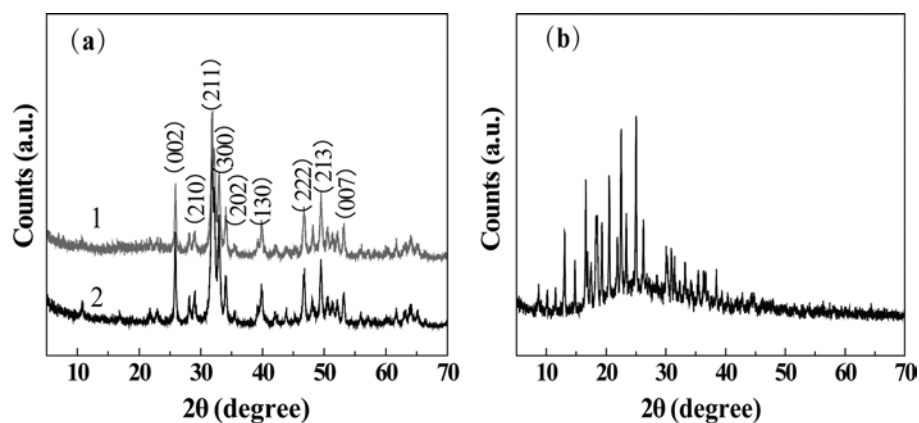

**Figure S1.** X-ray diffraction patterns of n-HA particles before (Curve 1) and after (Curve 2) loading of DOX (a) and pure DOX powder (b).

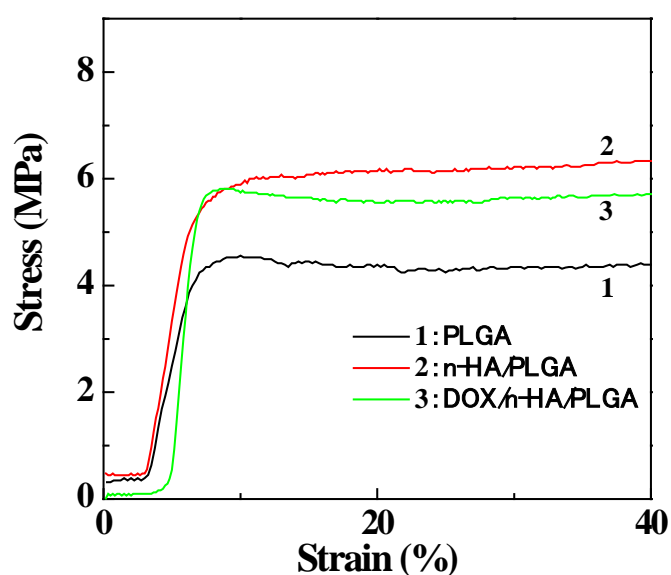

**Figure S2.** Representative stress-strain curves of electrospun PLGA (Curve 1), n-HA/PLGA composite fibers (the same n-HA weight ratio relative to DOX/n-HA/PLGA nanofibers) (Curve 2), and DOX/n-HA/PLGA (1 wt% DOX relative to PLGA, Curve 3) nanofibrous mats. The enlarged strain range of 0-40% is shown for clear comparison.

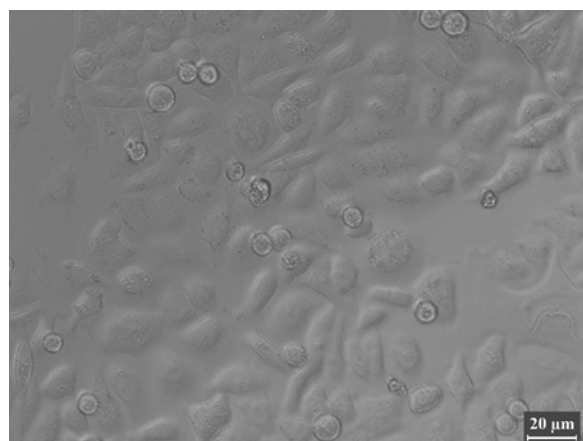

**Figure S3.** Photomicrographs of the control KB cells treated with PBS buffer.

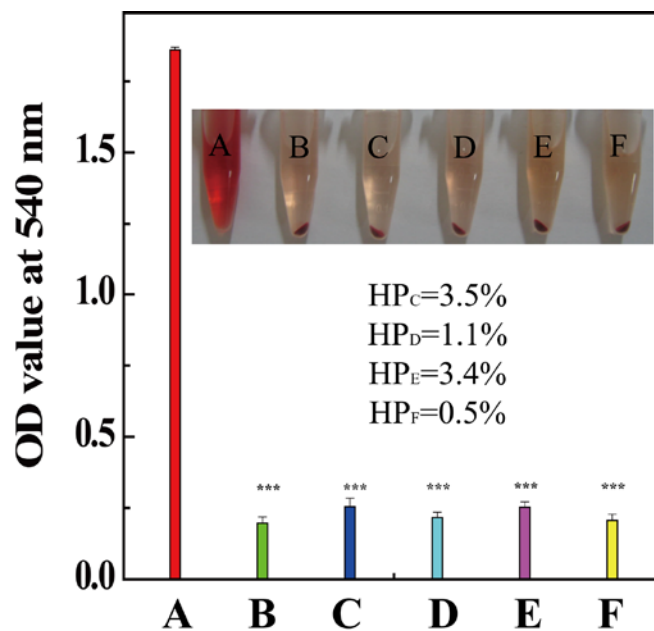

**Figure S4.** Hemolytic assay of electrospun PLGA nanofibers (C), n-HA/PLGA (D), DOX/PLGA (E) and DOX/n-HA/PLGA (F) composite nanofibers. Water (A) and PBS buffer (B) was used as positive and negative control, respectively.
